mobile table would accomplish the authors' goal, with minimal interference in patient care. Such a practice could also be standardized, allowing for situations in which placing items on the patient's chest is not practical (*e.g.*, pediatrics).

**Thomas M. Chalifoux, M.D.,\* Matthew P. Feuer, M.D.**

\*University of Pittsburgh School of Medicine, Magee-Womens Hospital of University of Pittsburgh Medical Center, and Children's Hospital of Pittsburgh of University of Pittsburgh Medical Center, Pittsburgh, Pennsylvania. chaltx@upmc.edu

## References

1. Mecham EM, Hopf HW: A proposal to minimize work area contamination during induction. *ANESTHESIOLOGY* 2012; 116:712
2. Salem MR: Verification of endotracheal tube position. *Anesthesiol Clin North America* 2001; 19:813-39
3. Schwartz DE, Matthay MA, Cohen NH: Death and other complications of emergency airway management in critically ill adults. A prospective investigation of 297 tracheal intubations. *ANESTHESIOLOGY* 1995; 82:367-76

(Accepted for publication June 27, 2012.)

## In Reply:

We appreciate the comments of Chalifoux and Feuer regarding our recent Images in Anesthesiology article.<sup>1</sup> We agree that identifying a specific site to isolate contaminated items is the key point, and that anesthesiologists may choose different options in meeting the goal. In our experience, we have found the chest to be a convenient location that allows us to keep our patient under continuous direct vision. We have not found the towel containing the contaminated equipment to interfere with auscultation and confirmation of endotracheal tube placement, and the towel allows for easy and rapid removal of the equipment after placement is verified. Using the anesthesia machine is an alternative, but we find this requires turning away from the patient, although we have colleagues who prefer that configuration. We agree that the chest is not ideal for small pediatric patients, but in that case there is generally room on the operating table for the towel. A Mayo stand or similar mobile tray is an excellent alternative, but requires additional workspace and may not be convenient in all anesthetizing locations. The crux of our proposal is to have a convenient space clearly identified as dirty to reduce anesthesia workspace contamination after intubating a patient. Anesthesia providers should create a systematic approach that works for their unique set of circumstances.

**Elise M. Mecham, M.D., Harriet W. Hopf, M.D.\*** \*University of Utah, Salt Lake City, Utah. harriet.hopf@hsc.utah.edu

## Reference

1. Mecham EM, Hopf HW: A proposal to minimize work area contamination during induction. *ANESTHESIOLOGY* 2012; 116:712

(Accepted for publication June 27, 2012.)

## Neurotoxicity: Rats *versus* Neonates

### To the Editor:

We just finished reading, in the March 2012 issue, the excellent editorial by Dr. Davidson entitled "Neurotoxicity and the Need for Anesthesia in the Newborn."<sup>1</sup> We wish to make a few comments. It is quite true; neonates have no explicit memory and when receiving no anesthesia for a particular surgical procedure (*i.e.*, patent ductus arteriosus) will never remember what took place should they survive. These patients need to be immobile (muscle relaxant only) to suit the surgeon, but do they really need an analgesic to cloud their minds when the surgeon makes his incision? Is the central nervous system and brain at this moment really intact and mature to perceive pain sensation during an operation? Because neonates are very small, underweight, and not mature at this age, why make them totally unconscious or even semiconscious? The nervous system and brain are not developed to any great degree, so they won't feel anything. In the late 1960s and middle to late 1970s,<sup>2-4</sup> neonates undergoing ligation of patent ductus arteriosus were semiconscious or totally conscious, had a muscle relaxant, had no narcotic for pain nor sedative and still survived with no neurotoxicity and no bad memories after growing up. These neonates showed no signs of distress during their procedure. One does not need a volatile anesthetic, potent narcotic, propofol, or other sedatives. If an anesthesia provider is worried about neurotoxicity of anesthetic drugs and agents, then the provider shouldn't administer the drugs. Performing research on animals such as rats and finding that certain medications and anesthetics cause neurotoxicity cannot or should not be extrapolated to humans. This research should be carried out in humans to confirm the hypothesis. It may be unpopular to say or suggest that neonates do not always need a hypnotic agent or such, but the fact remains many do not. Anesthesia providers (clinicians) must decide their technique based on factors such as patient height, weight, age, American Society of Anesthesiology class, surgical procedure, risk, and outcomes.

Again, data based on rat experiments<sup>5</sup> should not be extrapolated automatically to humans. More research on humans is needed. The article<sup>3</sup> was presented at the World Congress of Anesthesiology in 1976, Mexico City. The only question to arise was, "Did the neonate feel any pain?" The answer at the time was the same as now: "Does the neonate have a developed central nervous system and brain to perceive pain?" Is it developed? We do not know the exact answer to this very day. So the quandary still exists, and rat studies will not tell us emphatically, but if drugs and anesthetics are neurotoxic, then the clinician had better be careful in his decisions. The clinician must also be aware that administering an opioid to a very sick neonate could cause hypotension leading to a low pressure, which then leads to poor perfusion to vital organs, especially the heart and lungs, and poor perfusion to the central nervous system and brain. That is *neurotoxicity*. Also poor perfusion to the intestinal tract, which could
